# Supplementary material for: The half-life of the bone-derived hormone osteocalcin is regulated through O-glycosylation in mice, but not in humans
Source: eLife. 2020 Dec 7;9:e61174. doi: 10.7554/eLife.61174 (PMC7822592; doi:10.7554/eLife.61174)
Supplement: Figure 1—source data 7. [file elife-61174-fig1-data7.xlsx]

## Sheet: Figure 1H
Figure 1H
Raw data from the proteomics experiments can be downloaded through this link
	https://doi.org/10.6084/m9.figshare.13259891.v1
