# Supplementary material for: The half-life of the bone-derived hormone osteocalcin is regulated through O-glycosylation in mice, but not in humans
Source: eLife. 2020 Dec 7;9:e61174. doi: 10.7554/eLife.61174 (PMC7822592; doi:10.7554/eLife.61174)
Supplement: Figure 2—source data 1. [file elife-61174-fig2-data1.xlsx]

## Sheet: Figure 2A
Figure 2A
	Galnts mRNA level (copy numbers)
	Pre-osteoblasts			Osteoblasts
Galnt1	10613.3	28086.4	16543.1	45952.9	71716.1	53938.4
Galnt2	9694.77	10313.1	22814	24499.3	39892.6	32714.4
Galnt3	745.287	1303.91	944.101	5894.04	7424.11	6714.58
Galnt4	1972.02	4127.07	4293.95	4239.75	5014.33	4886.46
Galnt5	282.2	122.723	167.404	196.88	255.406	322.001
Galnt6	285.061	520.492	571.658	11354.4	20896.4	12359.4
Galnt7	1497.84	3006.82	2034.11	5392.83	7995.66	7955.42
Galnt9	553.046	88.177	367.662	773.482	334.422	321.733
Galnt10	7980.53	5976.04	5522.89	9006.39	11876.9	6059.97
Galnt11	3833.99	4490.52	5957.67	7570.87	11540.5	11058.1
Galnt12	156.2	218.53	169.08	1913.32	2269.21	2830.66
Galnt13	253.617	252.405	157.607	424.071	399.731	468.007
Galnt14	12.602	11.124	20.503	595.592	392.034	48.178
Galnt15	15.915	2.832	2.719	2.038	9.49	3.172
Galnt16	172.06	101.114	105.125	127.211	140.061	159.782
Galnt18	498.97	310.107	598.014	721.948	821.071	609.957
Galntl5	4.977	0.503	2.246	1.957	0.336	2.991
Galntl6	36.253	17.392	16.652	2.815	11.806	7.113
Wbscr17	184.673	210.022	209.259	275.041	236.573	263.582
