# Supplementary material for: The half-life of the bone-derived hormone osteocalcin is regulated through O-glycosylation in mice, but not in humans
Source: eLife. 2020 Dec 7;9:e61174. doi: 10.7554/eLife.61174 (PMC7822592; doi:10.7554/eLife.61174)
Supplement: Figure 2—source data 4. [file elife-61174-fig2-data4.xlsx]

## Sheet: Figure 2C
Figure 2C OCN ELISA
Gla OCN (% of total)
OCN-V5	OCN-V5+ Warfarin (50μM)	OCN-V5+ RVKR (50μM)	OCN-V5+ GalNAc-bn (2mM)
31.91	14.3	40.73	43.43
49.71	19.53	40.35	43.41
