# Supplementary material for: The half-life of the bone-derived hormone osteocalcin is regulated through O-glycosylation in mice, but not in humans
Source: eLife. 2020 Dec 7;9:e61174. doi: 10.7554/eLife.61174 (PMC7822592; doi:10.7554/eLife.61174)
Supplement: Figure 2—source data 6. [file elife-61174-fig2-data6.xlsx]

## Sheet: Figure 2D Graph
Figure 2D OCN ELISA
Gla OCN (% of total)
OCN-V5	OCN-V5+ RVKR (50μM)	OCNS8A-V5	OCNS8A-V5+ RVKR (50μM)
55.29	59.12	45.53	52.06
50.87	51.36	38.94	47.27
50.92	52.27	47.71	54.55
