# Supplementary material for: The half-life of the bone-derived hormone osteocalcin is regulated through O-glycosylation in mice, but not in humans
Source: eLife. 2020 Dec 7;9:e61174. doi: 10.7554/eLife.61174 (PMC7822592; doi:10.7554/eLife.61174)
Supplement: Figure 2—source data 8. [file elife-61174-fig2-data8.xlsx]

## Sheet: Figure 2E Graph
Figure 2E OCN ELISA
Gla OCN (% of total)
OCN-V5	OCN-V5+ Warfarin (50μM)	OCNS8A-V5	OCNS8A-V5+ Warfarin (50μM)
55.29	29.75	45.53	26.82
50.87	27.1	38.94	20.39
50.92	26.11	47.71	29.1
