# Supplementary material for: The half-life of the bone-derived hormone osteocalcin is regulated through O-glycosylation in mice, but not in humans
Source: eLife. 2020 Dec 7;9:e61174. doi: 10.7554/eLife.61174 (PMC7822592; doi:10.7554/eLife.61174)
Supplement: Figure 2—source data 9. [file elife-61174-fig2-data9.xlsx]

## Sheet: Figure 2F
Figure 2F WESTERN BLOT
		Overlap with the ladder						Short exposure						Long exposure
		Furin fl/fl		Furin fl/fl ; BGLAP-Cre
