# Supplementary material for: The half-life of the bone-derived hormone osteocalcin is regulated through O-glycosylation in mice, but not in humans
Source: eLife. 2020 Dec 7;9:e61174. doi: 10.7554/eLife.61174 (PMC7822592; doi:10.7554/eLife.61174)
Supplement: Figure 3—figure supplement 1—source data 1. [file elife-61174-fig3-figsupp1-data1.xlsx]

## Sheet: Figure 3- figure supp.1
Figure 3- figure supplement 1B
