# Supplementary material for: The half-life of the bone-derived hormone osteocalcin is regulated through O-glycosylation in mice, but not in humans
Source: eLife. 2020 Dec 7;9:e61174. doi: 10.7554/eLife.61174 (PMC7822592; doi:10.7554/eLife.61174)
Supplement: Figure 3—figure supplement 3—source data 1. [file elife-61174-fig3-figsupp3-data1.xlsx]

## Sheet: Figure 3-figure supp.3
Figure 3- figure supplement 3 A	% OCN from initial
	ucOCN					O-gly ucOCN
	2 hours at 37 °C				4°C		37°C
T0	Vehivle (V)	Pepstatin A (10uM)	RVKR (50uM)	3.5% BSA	T=2hours	T0	T=2hours
107.257	48.435	52.204	56.187	108.817	94.889	104.966	90.7639
96.173	65.561	57.434	66.776	110.019	99.695	101.342	95.538
96.57	67.236	69.095	77.978	106.215	100.104	93.6921	94.9829
