# Supplementary material for: The half-life of the bone-derived hormone osteocalcin is regulated through O-glycosylation in mice, but not in humans
Source: eLife. 2020 Dec 7;9:e61174. doi: 10.7554/eLife.61174 (PMC7822592; doi:10.7554/eLife.61174)
Supplement: Figure 3—figure supplement 3—source data 2. [file elife-61174-fig3-figsupp3-data2.xlsx]

## Sheet: Figure 3-figure supp.3
Figure 3- figure supplement 3 B
% OCN from initial
	2 hours at 37 °C		4°C
T0	Vehivle (V)	10 mM EDTA	T=2hours
101.293	34.6044	37.4138	108.817
99.9581	23.3169	24.2733	99.4066
98.7484	37.8813	37.4138	94.2529
