# Supplementary material for: The half-life of the bone-derived hormone osteocalcin is regulated through O-glycosylation in mice, but not in humans
Source: eLife. 2020 Dec 7;9:e61174. doi: 10.7554/eLife.61174 (PMC7822592; doi:10.7554/eLife.61174)
Supplement: Figure 3—figure supplement 4—source data 1. [file elife-61174-fig3-figsupp4-data1.xlsx]

## Sheet: Figure 3-figure supp. 4A
	Figure 3- figure supplement 4 A
		OCN ng/ml
	Time (minutes)	ucOCN									O-gly ucOCN
	0	0	0.5	0	0	3.3302	3.26028	3.24006	3.33901	3.27622	0	0	0	0.1	0	3.36257	3.2893	3.26028	3.30825	3.29076
	15	39.8	45.5	45.6	45.1	35.1743	29.737	14.178	30.7327	21.3988	46.2	44.9	53.1	55	58.1	56.7761	44.9277	33.3032	33.2619	59.3737
	30	67.5	58.2	51.8	52.9	43.5225	27.7536	13.8028	34.6937	14.8592	51.1	72.5	64.1	65.1	69.7	73.2131	40.3698	59.7893	47.4661	72.4542
	60	46.1	20.7	25.4	25.6	15.7562	8.76631	7.18986	10.7442	5.73968	25.1	44.3	31.5	48	45.3	33.8258	15.4045	40.4437	23.7235	29.4797
	90	16.3	7.1	9	10	6.04847	4.41808	4.7184	5.40472	3.96243	11	19.1	10	23.7	20.1	15.4634	7.18296	19.6312	11.8007	11.3777
	120	8.1	4.4	5.4	6	4.21699	3.71583	3.84113	4.05615	3.5624	5.5	9.5	4.6	13.3	10.2	7.4736	4.44252	8.53966	6.35138	5.87648
	180	1.9	2.1	1.8	1.6	3.44883	3.39809	3.37142	3.55171	3.36109	1.2	2.3	1	2.9	2.4	4.15792	3.4819	4.02147	3.73785	3.89422
