# Supplementary material for: The half-life of the bone-derived hormone osteocalcin is regulated through O-glycosylation in mice, but not in humans
Source: eLife. 2020 Dec 7;9:e61174. doi: 10.7554/eLife.61174 (PMC7822592; doi:10.7554/eLife.61174)
Supplement: Figure 3—figure supplement 4—source data 2. [file elife-61174-fig3-figsupp4-data2.xlsx]

## Sheet: Figure 3-figure supp. 4B
	Figure 3- figure supplement 4 B
		Serum OCN at 120 minutes (ng/ml)
	Dose (ng/g)	ucOCN				O-gly ucOCN
	40	8.1	4.4	5.4	6	9.5	4.6	13.3	10.2
	80	6.9	5.7	13		11.6	22.5	25.2	14.9
