# Supplementary material for: The half-life of the bone-derived hormone osteocalcin is regulated through O-glycosylation in mice, but not in humans
Source: eLife. 2020 Dec 7;9:e61174. doi: 10.7554/eLife.61174 (PMC7822592; doi:10.7554/eLife.61174)
Supplement: Figure 3—source data 3. [file elife-61174-fig3-data3.xlsx]

## Sheet: Figure 3C
Figure 3C
	% OCN from initial
Time (minutes)	ucOCN				O-gly ucOCN
0	100	100	100		100	100	100	100	100
15	87.12	96.06	88.64		104.05	103.67	102.35	105.37	92.42
30	81.17	85.25	89.81		101.88	103.94	104.58	102.79	91.16
60	73.26	71.37	69.04		103.47	108.33	103.46	102.59	95.58
90	67.25	65.66	66.87		108.43	106.59	107.8	102.59	92.9
120	60.11	56.59	51.87		105.8	103.15	105.98	106.96	90.05
180	51.85	46.92	43.79		106.82	107.93	107.38	119	78.77
300	36.92	36.25	30.65		106.53	103.54	104.58	102.19	88
