# Supplementary material for: The half-life of the bone-derived hormone osteocalcin is regulated through O-glycosylation in mice, but not in humans
Source: eLife. 2020 Dec 7;9:e61174. doi: 10.7554/eLife.61174 (PMC7822592; doi:10.7554/eLife.61174)
Supplement: Figure 3—source data 4. [file elife-61174-fig3-data4.xlsx]

## Sheet: Figure 3D
Figure 3D
% OCN from initial
ucOCN				O-gly ucOCN
	2hrs, 37°C		2hrs, 4°C		2hrs, 37°C
T0	Not HI	HI	Not HI	T0	Not HI
101.293	34.6044	108.817	108.817	101.482	100.756
99.9581	23.3169	108.937	99.4066	94.8783	92.4158
98.7484	37.8813	82.4298	94.2529	103.64	106.829
