# Supplementary material for: The half-life of the bone-derived hormone osteocalcin is regulated through O-glycosylation in mice, but not in humans
Source: eLife. 2020 Dec 7;9:e61174. doi: 10.7554/eLife.61174 (PMC7822592; doi:10.7554/eLife.61174)
Supplement: Figure 3—source data 5. [file elife-61174-fig3-data5.xlsx]

## Sheet: Figure 3E
Figure 3E
% OCN from initial
T0	4hrs, 37°C
Control	vehicle	Talabostat (10mM)
99.2	45.7	26.1
87.5	63.7	46.8
97.4	60.7	42.1
105.4	79.6	49.6
106.6	77.3	54.2
90.6
91.6
94.7
93.8
102.8
107.7
107.2
105.1
92.2
99.3
