# Supplementary material for: The half-life of the bone-derived hormone osteocalcin is regulated through O-glycosylation in mice, but not in humans
Source: eLife. 2020 Dec 7;9:e61174. doi: 10.7554/eLife.61174 (PMC7822592; doi:10.7554/eLife.61174)
Supplement: Figure 3—source data 6. [file elife-61174-fig3-data6.xlsx]

## Sheet: Figure 3F
Figure 3F
% OCN from initial
T0	4hrs, 37°C
Control	vehicle	PMSF (10mM)
107.41	54.93	23.19
96.89	50.31	20.23
95.7	45.25	22.07
