# Supplementary material for: The half-life of the bone-derived hormone osteocalcin is regulated through O-glycosylation in mice, but not in humans
Source: eLife. 2020 Dec 7;9:e61174. doi: 10.7554/eLife.61174 (PMC7822592; doi:10.7554/eLife.61174)
Supplement: Figure 3—source data 7. [file elife-61174-fig3-data7.xlsx]

## Sheet: Figure 3G
Figure 3G
	% OCN from initial
	2hrs, 37°C
Plasmin (U/ml)	ucOCN		O-gly ucOCN
0	91.2	108.8	96.7	103.3
0.024	69	80.5	81.4	86.9
0.12	38.3	44.1	63.3	75.7
0.3	11.5	15.5	34.5	40.8
Inset graph
	% OCN from initial in plasmin (0.3 U/ml)
	2hrs, 37°C
	ucOCN	O-gly ucOCN
	11.5	34.5
	15.5	40.8
	12.2976	32.0566
	11.4264	26.9615
	9.86095	38.6417
