# Supplementary material for: The half-life of the bone-derived hormone osteocalcin is regulated through O-glycosylation in mice, but not in humans
Source: eLife. 2020 Dec 7;9:e61174. doi: 10.7554/eLife.61174 (PMC7822592; doi:10.7554/eLife.61174)
Supplement: Figure 3—source data 8. [file elife-61174-fig3-data8.xlsx]

## Sheet: Figure 3H
Figure 3H
	OCN ng/ml
Time (minutes)	ucOCN				O-gly ucOCN
0	0	0	0	0	0	0	0	0	0
15	21.6173	16.5354	22.318	21.7818	24.3999	19.4151	16.3378	21.1248	17.8872
30	29.003	18.7696	19.092	16.7333	30.7009	26.9393	24.5678	23.6051	20.8792
60	21.8642	14.4179	15.0025	14.8463	27.4525	23.9393	23.8974	20.3894	18.971
90	15.6291	12.2221	12.9112	13.1802	26.3428	20.0232	21.0838	17.6077	15.6683
120	11.765	10.2542	10.8184	11.9553	21.6173	17.8872	18.4481	17.6077	15.5898
