# Supplementary material for: The half-life of the bone-derived hormone osteocalcin is regulated through O-glycosylation in mice, but not in humans
Source: eLife. 2020 Dec 7;9:e61174. doi: 10.7554/eLife.61174 (PMC7822592; doi:10.7554/eLife.61174)
Supplement: Figure 3—source data 9. [file elife-61174-fig3-data9.xlsx]

## Sheet: Figure 3I
Figure 3I
	% OCN from initial
Time (minutes)	ucOCN					O-gly ucOCN
30	100	100	100	100		100	100	100	100	100
60	75.3859	76.8151	78.5799	88.7232		89.4194	88.8637	97.2713	86.3768	90.8608
90	53.8878	65.1166	67.6262	78.7664		85.8046	74.3271	85.8187	74.5928	75.0429
120	40.5648	54.632	56.6648	71.446		70.4125	66.3983	75.0903	74.5928	74.6668
				ucOCN	Time (minutes)
				100	0
				79.876	30
				66.3492	60
				55.8269	90
					Min
				1/2 life	108.435
				O-gly	Time (minutes)
				100	0
				90.5584	30
				79.1172	60
				72.2321	90
					Min
				1/2 life	182.035
