# Supplementary material for: The half-life of the bone-derived hormone osteocalcin is regulated through O-glycosylation in mice, but not in humans
Source: eLife. 2020 Dec 7;9:e61174. doi: 10.7554/eLife.61174 (PMC7822592; doi:10.7554/eLife.61174)
Supplement: Figure 4—source data 1. [file elife-61174-fig4-data1.xlsx]

## Sheet: Figure 4A
Figure 4A
Ins1 gene expression (Fold change relative to vehicle)
Vehicle	ucOCN 0.3 ng/mL	O-gly ucOCN 0.1ng/mL	O-gly ucOCN 0.3ng/mL
0.257581	0.662528	2.43013	0.561754
1.69111	1.91294	1.59176	1.11274
1.83956	0.619843	2.18524	1.10917
0.880947	1.35879	2.57739	12.1113
0.717472	0.336562	3.07215	2.01869
0.613333	0.40246	3.0045	8.58329
	2.7342	4.23973	2.65623
	3.62434	2.65395	4.92357
	2.35365		2.25
	1.27374		0.710944
