# Supplementary material for: The half-life of the bone-derived hormone osteocalcin is regulated through O-glycosylation in mice, but not in humans
Source: eLife. 2020 Dec 7;9:e61174. doi: 10.7554/eLife.61174 (PMC7822592; doi:10.7554/eLife.61174)
Supplement: Figure 4—source data 2. [file elife-61174-fig4-data2.xlsx]

## Sheet: Figure 4B
Figure 4B
OCN measurements in stimulation media incubated for 8 hours either at at 4°C or with INS-1 cells at 37°C
	OCN ng/ml
	O-gly ucOCN			ucOCN
8 hours at 4°C	0.145	0.151	0.141	0.145	0.177	0.172
8 hours with INS-1 cells at 37°C	0.123	0.125	0.126	0.037	0.028	0.03
