# Supplementary material for: The half-life of the bone-derived hormone osteocalcin is regulated through O-glycosylation in mice, but not in humans
Source: eLife. 2020 Dec 7;9:e61174. doi: 10.7554/eLife.61174 (PMC7822592; doi:10.7554/eLife.61174)
Supplement: Figure 5—figure supplement 2—source data 1. [file elife-61174-fig5-figsupp2-data1.xlsx]

## Sheet: Figure 5- Figure supp. 2
Figure 5- figure supplement 2
	Optical density OD
ng/ml	uc-hOCN		O-gly uc-hOCN
6.4	1.557	1.379	1.364	1.414
3.2	0.702	0.634	0.753	0.713
1.6	0.33	0.309	0.346	0.332
0.8	0.175	0.157	0.166	0.198
0.4	0.12	0.082	0.115	0.109
0.2	0.07	0.063	0.075	0.071
0	0.044	0.044	0.044	0.044
