# Supplementary material for: The half-life of the bone-derived hormone osteocalcin is regulated through O-glycosylation in mice, but not in humans
Source: eLife. 2020 Dec 7;9:e61174. doi: 10.7554/eLife.61174 (PMC7822592; doi:10.7554/eLife.61174)
Supplement: Figure 5—figure supplement 3—source data 1. [file elife-61174-fig5-figsupp3-data1.xlsx]

## Sheet: Figure 5- figure supp.3
Figure 5- figure supplement 3
% hOCN from initial
	uc-hOCN				O-gly uc-hOCN
	2 hours at 37 °C			4°C		37°C
T0	Vehivle (V)	Pepstatin A (10uM)	RVKR (50uM)	T=2hours	T0	T=2hours
101.339	50.645	64.223	46.898	95.612	101.655	116.489
92.647	63.386	56.277	51.687	93.282	103.756	102.706
106.014	63.176	69.464	54.607	78.292	100	100
101.5	67.7			95.612
97.5	61.5			93.282
101	38.8			78.292
