# Supplementary material for: The half-life of the bone-derived hormone osteocalcin is regulated through O-glycosylation in mice, but not in humans
Source: eLife. 2020 Dec 7;9:e61174. doi: 10.7554/eLife.61174 (PMC7822592; doi:10.7554/eLife.61174)
Supplement: Figure 5—source data 6. [file elife-61174-fig5-data6.xlsx]

## Sheet: Figure 5G
Figure 5G
	% hOCN from initial
Time (minutes)	uc-hOCN				O-gly uc-hOCN
0	100	100	100	100	100	100	100	100
30	78.12	80.79	85.36	86.79	93.72	95.96	88.62	88.63
60	73.41	77.52	84.9	78.65	97.54	96.99	91.03	91.98
90	68.37	76.55	80.92	77.97	99.26	100.94	96.46	96.86
120	59.17	65.82	78.51	70.79	102.7	99.53	100.44	97.13
180	45.55	53.59	70.75	57.66	103.1	108.35	101.39	101.92
300	22.77	33.72	42.16	39.21	110.65	103.09	98.59	99.55
