# Supplementary material for: The half-life of the bone-derived hormone osteocalcin is regulated through O-glycosylation in mice, but not in humans
Source: eLife. 2020 Dec 7;9:e61174. doi: 10.7554/eLife.61174 (PMC7822592; doi:10.7554/eLife.61174)
Supplement: Figure 5—source data 7. [file elife-61174-fig5-data7.xlsx]

## Sheet: Figure 5H
Figure 5H
% hOCN from initial
uc-hOCN				O-gly uc-hOCN
	2hrs, 37°C		2hrs, 4°C		2hrs, 37°C
T0	Not HI	HI	Not HI	T0	Not HI
101.5	67.7	97.8	112.9	103.9	101.9
97.5	61.5	91.7	137.6	102.2	96.8
101	38.8	93.2	108.3	93.9	95.6
