# Supplementary material for: The half-life of the bone-derived hormone osteocalcin is regulated through O-glycosylation in mice, but not in humans
Source: eLife. 2020 Dec 7;9:e61174. doi: 10.7554/eLife.61174 (PMC7822592; doi:10.7554/eLife.61174)
Supplement: Table 1—source data 1. [file elife-61174-table1-data1.xlsx]

## Sheet: Table 1
Table 1
Serum osteocalcin concentration in wild time male mice at various
OCN ng/ml
2 weeks old	4 weeks old	13 weeks old	60 weeks old
1639.7	399.33	255.008	60.6536
1232.64	572.32	245.761	45.9307
1173.84	892.736	245.761	45.5715
1429.53	504.048	262.167	47.7373
1360.35	717.321
1387.77
1275.77
1457.81
